# Supplementary material
Source: ML conference proceedings conference paper supplement (https://proceedings.mlr.press/v97/cranko19a.html)
Supplement: Supplementary file [file cranko19a-supp.pdf]

# Monge blunts Bayes: Hardness Results for Adversarial Training

## — Supplementary Material —

Zac Cranko<sup>♠,†</sup> Aditya Krishna Menon<sup>♡</sup> Richard Nock<sup>†,♠,♣</sup>  
Cheng Soon Ong<sup>†,♠</sup> Zhan Shi<sup>◇</sup> Christian Walder<sup>†,♠</sup>

<sup>†</sup>Data61, <sup>♠</sup>the Australian National University, <sup>♡</sup>Google Research

<sup>♣</sup>the University of Sydney, <sup>◇</sup>University of Illinois at Chicago

firstname.lastname@{data61.csiro.au, anu.edu.au}; zshi22@uic.edu

### Abstract

This is the Supplementary Material to Paper ”Monge blunts Bayes: Hardness Results for Adversarial Training”, appearing in the proceedings of ICML 2019.

# 1 Table of contents

|                                              |       |
|----------------------------------------------|-------|
| <b>Supplementary material on proofs</b>      | Pg 3  |
| Proof of Theorem ?? and Corollary ??         | Pg 3  |
| Proof sketch of Corollary ??                 | Pg 6  |
| Proof of Theorem ??                          | Pg 6  |
| Proof of Theorem ??                          | Pg 9  |
| Proof of Lemma ??                            | Pg 9  |
| <b>Supplementary material on experiments</b> | Pg 10 |

## 2 Proof of Theorem ?? and Corollary ??

Our proof assumes basic knowledge about proper losses (see for example Reid & Williamson (2010)). From (Reid & Williamson, 2010, Theorem 1, Corollary 3) and Shuford et al. (1966),  $\ell$  being twice differentiable and proper, its conditional Bayes risk  $\underline{L}$  and partial losses  $\ell_1$  and  $\ell_{-1}$  are related by:

$$-\underline{L}''(c) = \frac{\ell'_{-1}(c)}{c} = -\frac{\ell'_1(c)}{1-c}, \forall c \in (0, 1). \quad (1)$$

The weight function (Reid & Williamson, 2010, Theorem 1) being also  $w = -\underline{L}''$ , we get from the integral representation of partial losses (Reid & Williamson, 2010, eq. (5)),

$$\ell_1(c) = -\int_c^1 (1-u)\underline{L}''(u)du, \quad (2)$$

from which we derive by integrating by parts and then using the Legendre conjugate of  $-\underline{L}$ ,

$$\begin{aligned} \ell_1(c) + \underline{L}(1) &= -[(1-u)\underline{L}'(u)]_c^1 - \int_c^1 \underline{L}'(u)du + \underline{L}(1) \\ &= (1-c)\underline{L}'(c) + \underline{L}(c) - \underline{L}(1) + \underline{L}(1) \end{aligned} \quad (3)$$

$$\begin{aligned} &= -(-\underline{L}')(c) + c \cdot (-\underline{L}')(c) - (-\underline{L})(c) \\ &= -(-\underline{L}')(c) + (-\underline{L})^*((-\underline{L})'(c)). \end{aligned} \quad (4)$$

Now, suppose that the way a real-valued prediction  $v$  is fit in the loss is through a general inverse link  $\psi^{-1} : \mathbb{R} \rightarrow (0, 1)$ . Let

$$v_{\ell, \psi} \doteq (-\underline{L}') \circ \psi^{-1}(v). \quad (5)$$

Since  $(-\underline{L}')^{-1}(v_{\ell, \psi}) = \psi^{-1}(v)$ , the proper composite loss  $\ell$  with link  $\psi$  on prediction  $v$  is the same as the proper composite loss  $\ell$  with link  $(-\underline{L}')$  on prediction  $v_{\ell, \psi}$ . This last loss is in fact using its canonical link and so is proper canonical (Reid & Williamson, 2010, Section 6.1), (Buja et al., 2005). Letting in this case  $c \doteq (-\underline{L}')^{-1}(v_{\ell, \psi})$ , we get that the partial loss satisfies

$$\ell_1(c) = -v_{\ell, \psi} + (-\underline{L})^*(v_{\ell, \psi}) - \underline{L}(1). \quad (6)$$

Notice the constant appearing on the right hand side. Notice also that if we see (3) as a Bregman divergence,  $\ell_1(c) = (-\underline{L})(1) - (-\underline{L})(c) - ((1-c)(-\underline{L}')(c) = D_{-\underline{L}}(1||c)$ , then the canonical link is the function that defines uniquely the dual affine coordinate system of the divergence (Amari & Nagaoka, 2000) (see also (Reid & Williamson, 2010, Appendix B)).

We can repeat the derivations for the partial loss  $\ell_{-1}$ , which yields (Reid & Williamson, 2010, eq. (5)):

$$\begin{aligned} \ell_{-1}(c) + \underline{L}(0) &= -\int_0^c u\underline{L}''(u)du + \underline{L}(0) \\ &= -[u\underline{L}'(u)]_0^c + \int_0^c \underline{L}'(u)du \\ &= -c\underline{L}'(c) + \underline{L}(c) - \underline{L}(0) + \underline{L}(0) \end{aligned} \quad (7)$$

$$\begin{aligned} &= c \cdot (-\underline{L}')(c) - (-\underline{L})(c) \\ &= (-\underline{L})^*((-\underline{L})'(c)), \end{aligned} \quad (8)$$

and using the canonical link, we get this time

$$\ell_{-1}(c) = (-\underline{L})^*(v_{\ell,\psi}) - \underline{L}(0). \quad (9)$$

We get from (6) and (9) the canonical proper composite loss

$$\ell(y, v) = (-\underline{L})^*(v_{\ell,\psi}) - \frac{y+1}{2} \cdot v_{\ell,\psi} - \frac{1}{2} \cdot ((1-y) \cdot \underline{L}(0) + (1+y) \cdot \underline{L}(1)). \quad (10)$$

Note that for the optimisation of  $\ell(y, v)$  for  $v$ , we could discount the right-hand side parenthesis, which acts just like a constant with respect to  $v$ . Using Fenchel-Young inequality yields the non-negativity of  $\ell(y, v)$  as it brings  $(-\underline{L})^*(v_{\ell,\psi}) - ((y+1)/2) \cdot v_{\ell,\psi} \geq \underline{L}((y+1)/2)$  and so

$$\begin{aligned} \ell(y, v) &\geq \underline{L}\left(\frac{1+y}{2}\right) - \frac{1}{2} \cdot ((1-y) \cdot \underline{L}(0) + (1+y) \cdot \underline{L}(1)) \\ &= \underline{L}\left(\frac{1}{2} \cdot (1-y) \cdot 0 + \frac{1}{2} \cdot (1+y) \cdot 1\right) - \frac{1}{2} \cdot ((1-y) \cdot \underline{L}(0) + (1+y) \cdot \underline{L}(1)) \\ &\geq 0, \forall y \in \{-1, 1\}, \forall v \in \mathbb{R}, \end{aligned} \quad (11)$$

from Jensen's inequality (the conditional Bayes risk  $\underline{L}$  is always concave (Reid & Williamson, 2010)). Now, if we consider the alternative use of Fenchel-Young inequality,

$$(-\underline{L})^*(v_{\ell,\psi}) - \frac{1}{2} \cdot v_{\ell,\psi} \geq \underline{L}\left(\frac{1}{2}\right), \quad (12)$$

then if we let

$$\Delta(y) \doteq \underline{L}\left(\frac{1}{2}\right) - \frac{1}{2} \cdot ((1-y) \cdot \underline{L}(0) + (1+y) \cdot \underline{L}(1)), \quad (13)$$

then we get

$$\ell(y, v) \geq \Delta(y) - \frac{y}{2} \cdot v_{\ell,\psi}, \forall y \in \{-1, 1\}, \forall v \in \mathbb{R}. \quad (14)$$

It follows from (11) and (14),

$$\ell(y, v) \geq \max\left\{0, \Delta(y) - \frac{y}{2} \cdot v_{\ell,\psi}\right\}, \forall y \in \{-1, 1\}, \forall v \in \mathbb{R}, \quad (15)$$

and we get,  $\forall h \in \mathbb{R}^{\mathcal{X}}, a \in \mathcal{X}^{\mathcal{X}}$ ,

$$\begin{aligned} &\mathbb{E}_{(X,Y) \sim D}[\ell(y, h \circ a(X))] \\ &\geq \mathbb{E}_{(X,Y) \sim D} \left[ \max\left\{0, \Delta(Y) - \frac{Y}{2} \cdot (h \circ a)_{\ell,\psi}(X)\right\} \right] \\ &\geq \max\left\{0, \mathbb{E}_{(X,Y) \sim D} \left[ \Delta(Y) - \frac{Y}{2} \cdot (h \circ a(X))_{\ell,\psi} \right] \right\} \\ &= \max\left\{0, \underline{L}\left(\frac{1}{2}\right) - \frac{1}{2} \cdot \mathbb{E}_{(X,Y) \sim D} [Y \cdot (h \circ a(X))_{\ell,\psi} + (1-Y) \cdot \underline{L}(0) + (1+Y) \cdot \underline{L}(1)] \right\} \\ &= \max\left\{0, \underline{L}\left(\frac{1}{2}\right) - \frac{1}{2} \cdot \begin{pmatrix} \mathbb{E}_{X \sim P} [\pi \cdot ((h \circ a(X))_{\ell,\psi} + 2\underline{L}(1))] \\ -\mathbb{E}_{X \sim N} [(1-\pi) \cdot ((h \circ a(X))_{\ell,\psi} - 2\underline{L}(0))] \end{pmatrix} \right\} \\ &= \max\left\{0, \underline{L}\left(\frac{1}{2}\right) - \frac{1}{2} \cdot (\varphi(P, (h \circ a)_{\ell,\psi}, \pi, 2\underline{L}(1)) - \varphi(N, (h \circ a)_{\ell,\psi}, 1-\pi, -2\underline{L}(0))) \right\} \end{aligned} \quad (16)$$

with

$$\varphi(Q, f, b, c) \doteq \int_{\mathbf{x}} b \cdot (f(\mathbf{x}) + c) dQ(\mathbf{x}), \quad (17)$$

and we recall

$$(h \circ a)_{\ell, \psi} = (-\underline{L}') \circ \psi^{-1} \circ h \circ a. \quad (18)$$

Hence,

$$\begin{aligned} & \min_{h \in \mathcal{H}} \mathbf{E}_{(X, Y) \sim D} [\max_{a \in \mathcal{A}} \ell(Y, h \circ a(X))] \\ & \geq \min_{h \in \mathcal{H}} \max_{a \in \mathcal{A}} \mathbf{E}_{(X, Y) \sim D} [\ell(Y, h \circ a(X))] \quad (19) \\ & \geq \min_{h \in \mathcal{H}} \max_{a \in \mathcal{A}} \max \left\{ 0, \underline{L} \left( \frac{1}{2} \right) - \frac{1}{2} \cdot (\varphi(P, (h \circ a)_{\ell, \psi}, \pi, 2\underline{L}(1)) - \varphi(N, (h \circ a)_{\ell, \psi}, 1 - \pi, -2\underline{L}(0))) \right\} \\ & \geq \max_{a \in \mathcal{A}} \min_{h \in \mathcal{H}} \max \left\{ 0, \underline{L} \left( \frac{1}{2} \right) - \frac{1}{2} \cdot (\varphi(P, (h \circ a)_{\ell, \psi}, \pi, 2\underline{L}(1)) - \varphi(N, (h \circ a)_{\ell, \psi}, 1 - \pi, -2\underline{L}(0))) \right\} \\ & = \max_{a \in \mathcal{A}} \max \left\{ 0, \min_{h \in \mathcal{H}} \left( \underline{L} \left( \frac{1}{2} \right) - \frac{1}{2} \cdot (\varphi(P, (h \circ a)_{\ell, \psi}, \pi, 2\underline{L}(1)) - \varphi(N, (h \circ a)_{\ell, \psi}, 1 - \pi, -2\underline{L}(0))) \right) \right\} \\ & = \max_{a \in \mathcal{A}} \max \left\{ 0, \underline{L} \left( \frac{1}{2} \right) - \frac{1}{2} \cdot \max_{h \in \mathcal{H}} (\varphi(P, (h \circ a)_{\ell, \psi}, \pi, 2\underline{L}(1)) - \varphi(N, (h \circ a)_{\ell, \psi}, 1 - \pi, -2\underline{L}(0))) \right\} \\ & = \max_{a \in \mathcal{A}} \left( \underline{L} \left( \frac{1}{2} \right) - \frac{1}{2} \cdot \max_{h \in \mathcal{H}} (\varphi(P, (h \circ a)_{\ell, \psi}, \pi, 2\underline{L}(1)) - \varphi(N, (h \circ a)_{\ell, \psi}, 1 - \pi, -2\underline{L}(0))) \right)_+ \\ & = \left( \underline{L} \left( \frac{1}{2} \right) - \frac{1}{2} \cdot \min_{a \in \mathcal{A}} \max_{h \in \mathcal{H}} (\varphi(P, (h \circ a)_{\ell, \psi}, \pi, 2\underline{L}(1)) - \varphi(N, (h \circ a)_{\ell, \psi}, 1 - \pi, -2\underline{L}(0))) \right)_+ \\ & = \left( \underline{L} \left( \frac{1}{2} \right) - \frac{1}{2} \cdot \min_{a \in \mathcal{A}} \gamma_{\mathcal{H}, a}^g(P, N, \pi, 2\underline{L}(1), 2\underline{L}(0)) \right)_+ \\ & = \left( \ell^\circ - \frac{1}{2} \cdot \min_{a \in \mathcal{A}} \gamma_{\mathcal{H}, a}^g(P, N, \pi, 2\underline{L}(1), 2\underline{L}(0)) \right)_+ \\ & = \left( \ell^\circ - \frac{1}{2} \cdot \min_{a \in \mathcal{A}} \beta_a \right)_+, \quad (20) \end{aligned}$$

as claimed for the statement of Theorem ?? (we have let  $g \doteq (-\underline{L}') \circ \psi^{-1}$ ). Hence, if, for some  $\varepsilon \in [0, 1]$ ,

$$\exists a \in \mathcal{A} : \gamma_{\mathcal{H}, a}^g(P, N, \pi, 2\underline{L}(1), 2\underline{L}(0)) \leq 2\varepsilon \cdot \ell^\circ, \quad (21)$$

then

$$\begin{aligned} \min_{h \in \mathcal{H}} \mathbf{E}_{(X, Y) \sim D} [\max_{a \in \mathcal{A}} \ell(Y, h \circ a(X))] & \geq (\ell^\circ - \varepsilon \cdot \ell^\circ)_+ \\ & = (1 - \varepsilon) \cdot \ell^\circ, \quad (22) \end{aligned}$$

which ends the proof of Corollary ?? if  $\ell$  is proper composite with link  $\psi$ . If it is proper canonical, then  $(-\underline{L}') \circ \psi^{-1} = \text{Id}$  and so  $\gamma_{\mathcal{H}, a}^g = \gamma_{\mathcal{H}, a}$  in (21).

**Remark 1** *Theorem ?? and Corollary ?? are very general, which naturally questions the optimality of the condition in Corollary ?? to defeat  $\mathcal{H}$  – and therefore the optimality of the Monge adversaries to appear later. Inspecting their proof shows that suboptimality comes essentially from the use of Fenchel-Young inequality in (12). There are ways to strengthen this result for subclasses of losses, which might result in fine in the characterisation of different but arguably more specific adversaries.*

### 3 Proof sketch of Corollary ??

Recall that  $\beta_a = \gamma_{\mathcal{H},a}(P, N, \frac{1}{2}, 2\underline{L}(1), 2\underline{L}(0))$ . We prove the following, more general result which does not assume  $\pi = 1/2$  nor  $\gamma_{\text{hard}}^\ell = 0$ .

**Corollary 2** *Suppose  $\ell$  is canonical proper and let  $\mathcal{H}$  denote the unit ball of a reproducing kernel Hilbert space (RKHS) of functions with reproducing kernel  $\kappa$ . Denote*

$$\mu_{a,Q} \doteq \int_{\mathbf{x}} \kappa(a(\mathbf{x}), \cdot) dQ(\mathbf{x}) \quad (23)$$

*the adversarial mean embedding of  $a$  on  $Q$ . Then*

$$\begin{aligned} & 2 \cdot \gamma_{\mathcal{H},a}(P, N, \pi, 2\underline{L}(1), 2\underline{L}(0)) \\ &= \gamma_{\text{hard}}^\ell + \|\pi \cdot \mu_{a,P} - (1 - \pi) \cdot \mu_{a,N}\|_{\mathcal{H}}. \end{aligned}$$

**Proof** It comes from the reproducing property of  $\mathcal{H}$ ,

$$\begin{aligned} & 2 \cdot \gamma_{\mathcal{H},a}(P, N, \pi, 2\underline{L}(1), 2\underline{L}(0)) \\ &= \gamma_{\text{hard}}^\ell + \max_{h \in \mathcal{H}} \left\{ \pi \cdot \int_{\mathbf{x}} h \circ a(\mathbf{x}) dP(\mathbf{x}) - (1 - \pi) \cdot \int_{\mathbf{x}} h \circ a(\mathbf{x}) dN(\mathbf{x}) \right\} \\ &= \gamma_{\text{hard}}^\ell + \max_{h \in \mathcal{H}} \left\{ \pi \cdot \left\langle h, \int_{\mathbf{x}} \kappa(a(\mathbf{x}), \cdot) dP(\mathbf{x}) \right\rangle_{\mathcal{H}} - (1 - \pi) \cdot \left\langle h, \int_{\mathbf{x}} \kappa(a(\mathbf{x}), \cdot) dN(\mathbf{x}) \right\rangle_{\mathcal{H}} \right\} \\ &= \gamma_{\text{hard}}^\ell + \max_{h \in \mathcal{H}} \left\{ \langle h, \pi \cdot \mu_{a,P} - (1 - \pi) \cdot \mu_{a,N} \rangle_{\mathcal{H}} \right\} \\ &= \gamma_{\text{hard}}^\ell + \|\pi \cdot \mu_{a,P} - (1 - \pi) \cdot \mu_{a,N}\|_{\mathcal{H}}, \end{aligned} \quad (24)$$

as claimed, where the last equality holds for the unit ball. ■

### 4 Proof of Theorem ??

We first show a Lemma giving some additional properties on our definition on Lipschitzness.

**Lemma 3** *Suppose  $\mathcal{H}$  is  $(u, v, K)$ -Lipschitz. If  $c$  is symmetric, then  $\{u \circ h - v \circ h\}_{h \in \mathcal{H}}$  is  $2K$ -Lipschitz. If  $c$  satisfies the triangle inequality, then  $u - v$  is bounded. If  $c$  satisfies the identity of indiscernibles, then  $u \leq v$ .*

**Proof** If  $c$  is symmetric, then we just add two instances of (??) with  $\mathbf{x}$  and  $\mathbf{y}$  permuted, reorganize and get:

$$\begin{aligned} u \circ h(\mathbf{x}) - v \circ h(\mathbf{y}) + u \circ h(\mathbf{y}) - v \circ h(\mathbf{x}) &\leq K \cdot (c(\mathbf{x}, \mathbf{y}) + c(\mathbf{y}, \mathbf{x})), \forall h \in \mathcal{H}, \forall \mathbf{x}, \mathbf{y} \in \mathcal{X}. \\ \Leftrightarrow (u \circ h - v \circ h)(\mathbf{x}) - (u \circ h - v \circ h)(\mathbf{y}) &\leq 2Kc(\mathbf{x}, \mathbf{y}), \forall h \in \mathcal{H}, \forall \mathbf{x}, \mathbf{y} \in \mathcal{X}. \end{aligned}$$

and we get the statement of the Lemma. If  $c$  satisfies the triangle inequality, then we add again two instances of (??) but this time as follows:

$$\begin{aligned} u \circ h(\mathbf{x}) - v \circ h(\mathbf{y}) + u \circ h(\mathbf{y}) - v \circ h(\mathbf{z}) &\leq K \cdot (c(\mathbf{x}, \mathbf{y}) + c(\mathbf{y}, \mathbf{z})), \forall h \in \mathcal{H}, \forall \mathbf{x}, \mathbf{y}, \mathbf{z} \in \mathcal{X}. \\ \Leftrightarrow u \circ h(\mathbf{x}) - v \circ h(\mathbf{z}) + \Delta(\mathbf{y}) &\leq Kc(\mathbf{x}, \mathbf{z}), \forall h \in \mathcal{H}, \forall \mathbf{x}, \mathbf{y}, \mathbf{z} \in \mathcal{X}, \end{aligned}$$

where  $\Delta(\mathbf{y}) \doteq u \circ h(\mathbf{y}) - v \circ h(\mathbf{y})$ . If  $c$  is finite for at least one couple  $(\mathbf{x}, \mathbf{z})$ , then we cannot have  $u - v$  unbounded in  $\cup_h \text{Im}(h)$ . Finally, if  $c$  satisfies the identity of indiscernibles, then picking  $\mathbf{x} = \mathbf{y}$  in (??) yields  $u \circ h(\mathbf{x}) - v \circ h(\mathbf{x}) \leq 0, \forall h \in \mathcal{H}, \forall \mathbf{x} \in \mathcal{X}$  and so  $(u - v)(\cup_h \text{Im}(h)) \cap \mathbb{R}_+ \subseteq \{0\}$ , which, disregarding the images in  $\mathcal{H}$  for simplicity, yields  $u \leq v$ . ■

We now prove TheoremOTA. In fact, we shall prove the following more general Theorem.

**Theorem 4** Fix any  $\varepsilon > 0$  and proper loss  $\ell$  with link  $\psi$ . Suppose  $\exists c : \mathcal{X} \times \mathcal{X} \rightarrow \mathbb{R}$  such that:

- (1)  $\mathcal{H}$  is  $(\pi \cdot g, (1 - \pi) \cdot g, K)$ -Lipschitz with respect to  $c$ , where  $g$  is defined in (??);
- (2)  $\mathcal{A}$  is  $\delta$ -Monge efficient for cost  $c$  on marginals  $P, N$  for

$$\delta \leq 2 \cdot \frac{2\varepsilon\ell^\circ - \gamma_{\text{hard}}^\ell}{K}. \quad (25)$$

Then  $\mathcal{H}$  is  $\varepsilon$ -defeated by  $\mathcal{A}$  on  $\ell$ .

**Proof** We have for all  $a \in \mathcal{A}$ ,

$$\begin{aligned} &\max_{h \in \mathcal{H}} (\varphi(P, h \circ a, \pi, 2\underline{L}(1)) - \varphi(N, h \circ a, 1 - \pi, -2\underline{L}(0))) \\ &= \gamma_{\text{hard}}^\ell + \frac{1}{2} \cdot \max_{h \in \mathcal{H}} \left( \int_{\mathcal{X}} \pi \cdot g \circ h \circ a(\mathbf{x}) dP(\mathbf{x}) - \int_{\mathcal{X}} (1 - \pi) \cdot g \circ h \circ a(\mathbf{x}') dN(\mathbf{x}') \right), \quad (26) \end{aligned}$$

where we recall  $g \doteq (-\underline{L}') \circ \psi^{-1}$ . Let us denote for short

$$\Delta \doteq \max_{h \in \mathcal{H}} \left( \int_{\mathcal{X}} \pi \cdot g \circ h \circ a(\mathbf{x}) dP(\mathbf{x}) - \int_{\mathcal{X}} (1 - \pi) \cdot g \circ h \circ a(\mathbf{x}') dN(\mathbf{x}') \right). \quad (27)$$

$\mathcal{H}$  being  $(\pi \cdot g, (1 - \pi) \cdot g, K)$ -Lipschitz for cost  $c$ , since

$$\mathcal{H} \subseteq \{h \in \mathbb{R}^{\mathcal{X}} : \pi g \circ h \circ a(\mathbf{x}) - (1 - \pi)g \circ h \circ a(\mathbf{x}') \leq Kc(a(\mathbf{x}), a(\mathbf{x}')), \forall \mathbf{x}, \mathbf{x}' \in \mathcal{X}\},$$

it comes after letting for short  $\Psi \doteq \pi g \circ h \circ a, \chi \doteq (1 - \pi)g \circ h \circ a$ ,

$$\begin{aligned} \Delta &\leq \max_{\Psi(\mathbf{x}) - \chi(\mathbf{x}') \leq Kc(a(\mathbf{x}), a(\mathbf{x}'))} \left( \int_{\mathcal{X}} \Psi(\mathbf{x}) dP(\mathbf{x}) - \int_{\mathcal{X}} \chi(\mathbf{x}') dN(\mathbf{x}') \right) \\ &\leq K \cdot \inf_{\mu \in \Pi(P, N)} \int c(a(\mathbf{x}), a(\mathbf{x}')) d\mu(\mathbf{x}, \mathbf{x}'). \quad (28) \end{aligned}$$

See for example (Villani, 2009, Section 4) for the last inequality. Now, if some adversary  $a \in \mathcal{A}$  is  $\delta$ -Monge efficient for cost  $c$ , then

$$K \cdot \inf_{\mu \in \Pi(P, N)} \int c(a(\mathbf{x}), a(\mathbf{x}')) d\mu(\mathbf{x}, \mathbf{x}') \leq K\delta. \quad (29)$$

From Theorem ??, if we want  $\mathcal{H}$  to be  $\varepsilon$ -defeated by  $\mathcal{A}$ , then it is sufficient from (26) that  $a$  satisfies

$$\gamma_{\text{hard}}^\ell + \frac{1}{2} \cdot K\delta \leq 2\varepsilon\ell^\circ, \quad (30)$$

resulting in

$$\delta \leq 2 \cdot \frac{2\varepsilon\ell^\circ - \gamma_{\text{hard}}^\ell}{K}, \quad (31)$$

as claimed. ■

**Remark 1** note that unless  $\pi = 1/2$ ,  $c$  cannot be a distance in the general case for Theorem ??: indeed, the identity of indiscernibles and Lemma 3 enforce  $(1 - 2\pi) \cdot g \geq 0$  and so  $g$  cannot take both signs, which is impossible whenever  $\ell$  is canonical proper as  $g = \text{Id}$  in this case. We take it as a potential difficulty for the adversary which, we recall, cannot act on  $\pi$ .

**Remark 2** In the light of recent results (Cissé et al., 2017; Cranko et al., 2018; Miyato et al., 2018), there is an interesting corollary to Theorem ?? when  $\pi = 1/2$  using a form of Lipschitz continuity of the *link* of the loss .

**Corollary 5** Suppose loss  $\ell$  is proper with link  $\psi$  and furthermore its canonical link satisfies, some  $K_\ell > 0$ :

$$(\underline{L})'(y) - (\underline{L})'(y') \leq K_\ell \cdot |\psi(y) - \psi(y')|, \forall y, y' \in [0, 1].$$

Suppose furthermore that (i)  $\pi = 1/2$ , (ii)  $\mathcal{H}$  is  $K_h$ -Lipschitz with respect to some non-negative  $c$  and (iii)  $\mathcal{A}$  is  $\delta$ -Monge efficient for cost  $c$  on marginals  $P, N$  for

$$\delta \leq \frac{4\varepsilon\ell^\circ - 2\gamma_{\text{hard}}^\ell}{K_\ell K_h}. \quad (32)$$

Then  $\mathcal{H}$  is  $\varepsilon$ -defeated by  $\mathcal{A}$  on  $\ell$ .

**Proof** The domination condition on links,

$$(\underline{L})'(y) - (\underline{L})'(y') \leq K_\ell \cdot |\psi(y) - \psi(y')|, \forall y, y' \in [0, 1], \quad (33)$$

implies  $g$  is Lipschitz and letting  $y \doteq \psi^{-1} \circ h \circ a(\mathbf{x})$ ,  $y' \doteq \psi^{-1} \circ h \circ a(\mathbf{x}')$ , we obtain equivalently  $g \circ h \circ a(\mathbf{x}) - g \circ h \circ a(\mathbf{x}') \leq K_\ell \cdot |h \circ a(\mathbf{x}) - h \circ a(\mathbf{x}')|$ ,  $\forall \mathbf{x}, \mathbf{x}' \in \mathcal{X}$ . But  $\mathcal{H}$  is  $K_h$ -Lipschitz with respect to some non-negative  $c$ , so we have  $|h \circ a(\mathbf{x}) - h \circ a(\mathbf{x}')| \leq K_h c(a(\mathbf{x}), a(\mathbf{x}'))$ , and so bringing these two inequalities together, we have from the proof of Theorem ?? that  $\Delta$  now satisfies

$$\Delta \leq \frac{K_\ell K_h}{2} \cdot \inf_{\mu \in \Pi(P, N)} \int c(a(\mathbf{x}), a(\mathbf{x}')) d\mu(\mathbf{x}, \mathbf{x}'), \quad (34)$$



so to be  $\varepsilon$ -defeated by  $\mathcal{A}$  on  $\ell$ , we now want that  $a$  satisfies

$$\gamma_{\text{hard}}^\ell + \frac{K_\ell K_h}{2} \cdot \delta \leq 2\varepsilon\ell^\circ, \quad (35)$$

resulting in the statement of the Corollary. ■

## 5 Proof of Theorem ??

Denote  $a^J \doteq a \circ a \circ \dots \circ a$  ( $J$  times). We have by definition

$$\begin{aligned} C_\Phi(a^J, P, N) &\doteq \inf_{\mu \in \Pi(P, N)} \int_{\mathcal{X}} \|\Phi \circ a^J(\mathbf{x}) - \Phi \circ a^J(\mathbf{x}')\|_{\mathcal{H}} d\mu(\mathbf{x}, \mathbf{x}') \\ &= \inf_{\mu \in \Pi(P, N)} \int_{\mathcal{X}} \|\Phi \circ a \circ a^{J-1}(\mathbf{x}) - \Phi \circ a \circ a^{J-1}(\mathbf{x}')\|_{\mathcal{H}} d\mu(\mathbf{x}, \mathbf{x}') \\ &\leq (1 - \eta) \cdot \inf_{\mu \in \Pi(P, N)} \int_{\mathcal{X}} \|\Phi \circ a^{J-1}(\mathbf{x}) - \Phi \circ a^{J-1}(\mathbf{x}')\|_{\mathcal{H}} d\mu(\mathbf{x}, \mathbf{x}') \\ &\quad \vdots \\ &\leq (1 - \eta)^J \cdot \inf_{\mu \in \Pi(P, N)} \int_{\mathcal{X}} \|\Phi(\mathbf{x}) - \Phi(\mathbf{x}')\|_{\mathcal{H}} d\mu(\mathbf{x}, \mathbf{x}') \\ &= (1 - \eta)^J \cdot W_1^\Phi, \end{aligned} \quad (36)$$

where we have used the assumption that  $a$  is  $\eta$ -contractive and the definition of  $W_1^\Phi$ . There remains to bound the last line by  $\delta$  and solve for  $J$  to get the statement of the Theorem. We can also stop at (36) to conclude that  $\mathcal{A}$  is  $\delta$ -Monge efficient for  $\delta = (1 - \eta)^J \cdot W_1^\Phi$ . The number of iterations for  $\mathcal{A}^J$  to be  $\delta$ -Monge efficient is obtained from (37) as

$$J \geq \frac{1}{\log\left(\frac{1}{1-\eta}\right)} \cdot \log \frac{W_1^\Phi}{\delta}, \quad (38)$$

which gives the statement of the Theorem once we remark that  $\log(1/(1 - \eta)) \geq \eta$ .

## 6 Proof of Lemma ??

The proof follows from the observation that for any  $\mathbf{x}, \mathbf{x}'$  in  $\mathcal{S}$ ,

$$\|a(\mathbf{x}) - a(\mathbf{x}')\| = \lambda \|\mathbf{x} - \mathbf{x}'\|, \quad (39)$$

where  $\|\cdot\|$  is the metric of  $\mathcal{X}$ . Thus, letting  $a$  denote a mixup to  $\mathbf{x}^*$  adversary for some  $\lambda \in [0, 1]$ , we have  $C(a, P, N) = \lambda \cdot W_1(dP, dN)$ , where  $W_1(dP, dN)$  denotes the Wasserstein distance of order 1 between the class marginals.  $\delta > 0$  being fixed, all mixups to  $\mathbf{x}^*$  adversaries in  $\mathcal{A}$  that are also  $\delta$ -Monge efficient are those for which:

$$\lambda \leq \frac{\delta}{W_1(dP, dN)}, \quad (40)$$

and we get the statement of the Lemma.

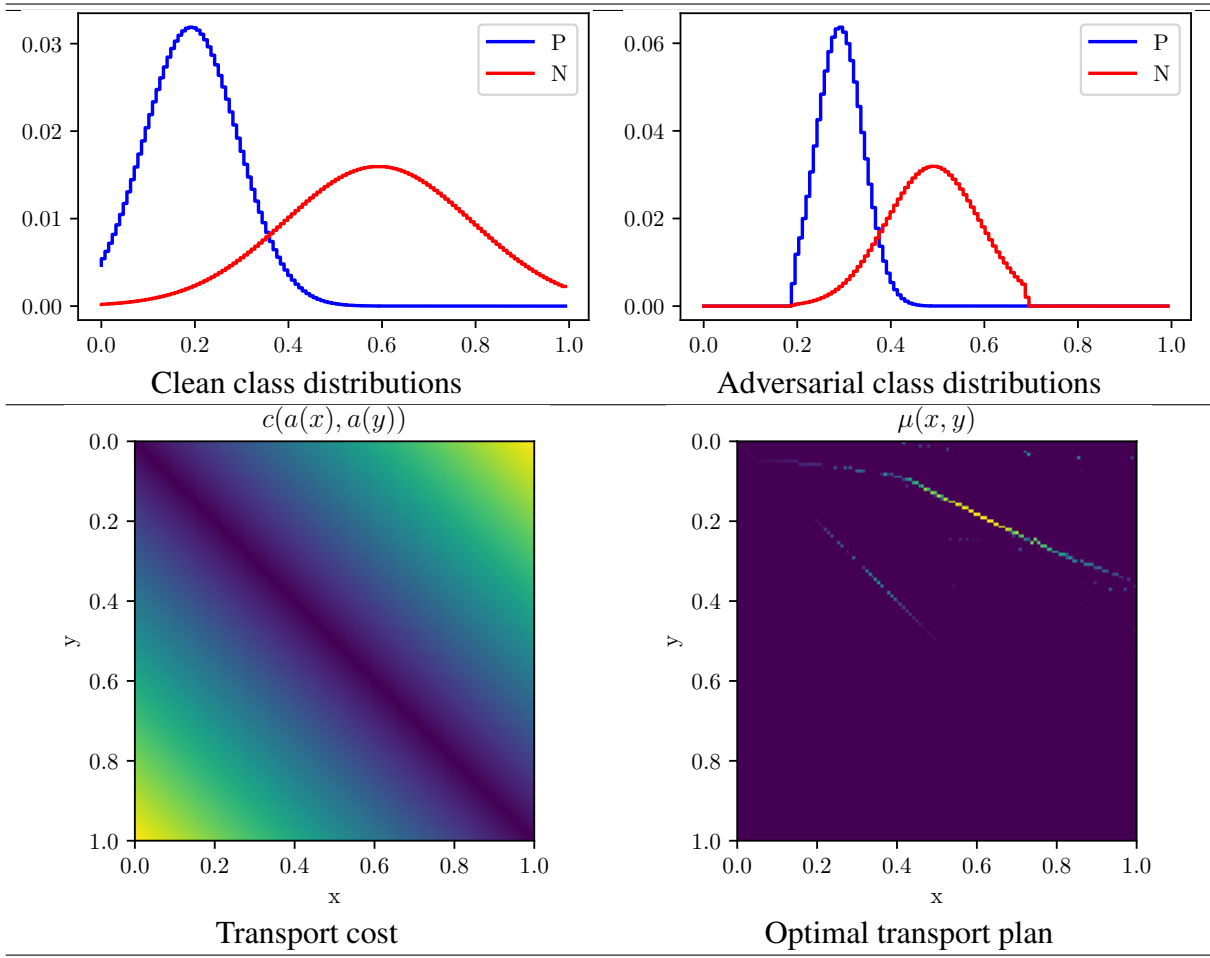

Figure 1: Visualising the toy example for the case  $\alpha = 0.5$ . Clockwise from top left: (a) the clean class conditional distributions, (b) the class distributions mapped by the adversary  $a$ , (c) the transport cost  $c$  under the adversarial mapping  $a$ , (d) the corresponding optimal transport  $\mu$ .

## 7 Experiments

Figure 1 includes detailed plots for the  $\alpha = 0.5$  case of the numerical toy example.

## References

- Amari, S.-I. and Nagaoka, H. *Methods of Information Geometry*. Oxford University Press, 2000.
- Buja, A., Stuetzle, W., and Shen, Y. Loss functions for binary class probability estimation and classification: structure and applications, 2005. Technical Report, University of Pennsylvania.
- Cissé, M., Bojanowski, P., Grave, E., Dauphin, Y., and Usunier, N. Parseval networks: improving robustness to adversarial examples. In *34<sup>th</sup> ICML, 2017*.

- Cranko, Z., Kornblith, S., Shi, Z., and Nock, R. Lipschitz networks and distributional robustness. *CoRR*, abs/1809.01129, 2018.
- Miyato, T., Kataoka, T., Koyama, M., and Yoshida, Y. Spectral normalization for generative adversarial networks. In *ICLR'18*, 2018.
- Reid, M.-D. and Williamson, R.-C. Composite binary losses. *JMLR*, 11:2387–2422, 2010.
- Shuford, E., Albert, A., and Massengil, H.-E. Admissible probability measurement procedures. *Psychometrika*, pp. 125–145, 1966.
- Villani, C. *Optimal transport, old and new*. Springer, 2009.
